# Supplementary material for: An unusual (4,10)-connected 3-D metal–organic framework based on non-planar tricarboxyl tecton and tetracadmium(ii) secondary building units
Source: Royal Society of Chemistry journal article supplement (doi:10.1039/c2ce25194a), 2012-01-01
Supplement: c2ce25194a.pdf [file c2ce25194a.pdf]

***Electronic Supplementary Information (ESI) for***

**An unusual (4,10)-connected 3-D metal–organic framework based  
on a non-planar tricarboxyl tecton and tetracadmium(II) secondary  
building units**

**Shao-Ming Fang,<sup>a</sup> Min Chen,<sup>a</sup> Xiao-Gang Yang,<sup>a</sup> Cong Wang,<sup>a</sup> Miao Du<sup>\*b</sup> and  
Chun-Sen Liu<sup>\*a</sup>**

<sup>a</sup> Zhengzhou University of Light Industry, Henan Provincial Key Laboratory of Surface & Interface  
Science, Zhengzhou, Henan 450002, P. R. China. E-mail: [chunsenliu@zzuli.edu.cn](mailto:chunsenliu@zzuli.edu.cn) (C.-S.L.)

<sup>b</sup> College of Chemistry, Tianjin Key Laboratory of Structure and Performance for Functional Molecule,  
Tianjin Normal University, Tianjin 300387, P. R. China. E-mail: [dumiao@public.tpt.tj.cn](mailto:dumiao@public.tpt.tj.cn) (M.D.)

***CrystEngComm***

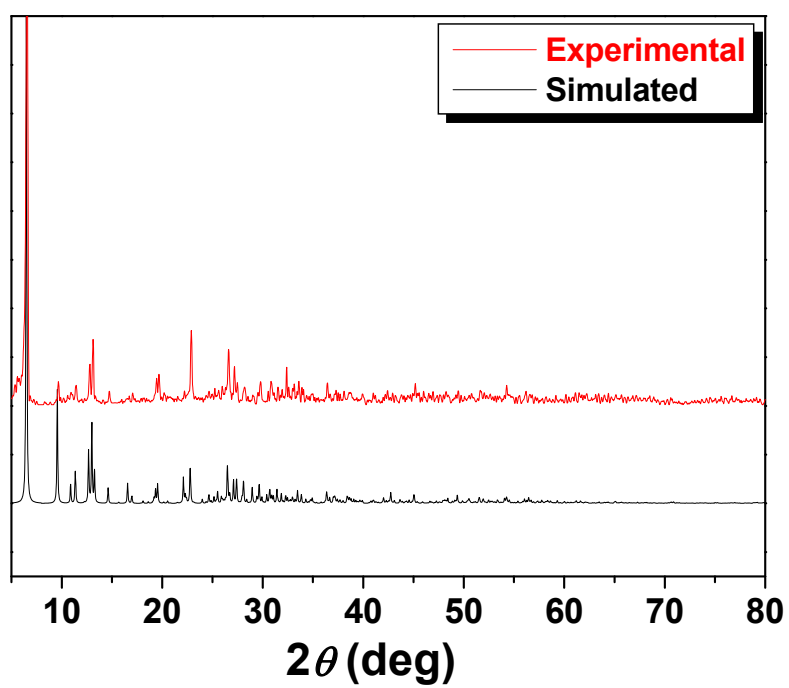

**Fig. S1** Simulated and experimental PXRD patterns of **1**.

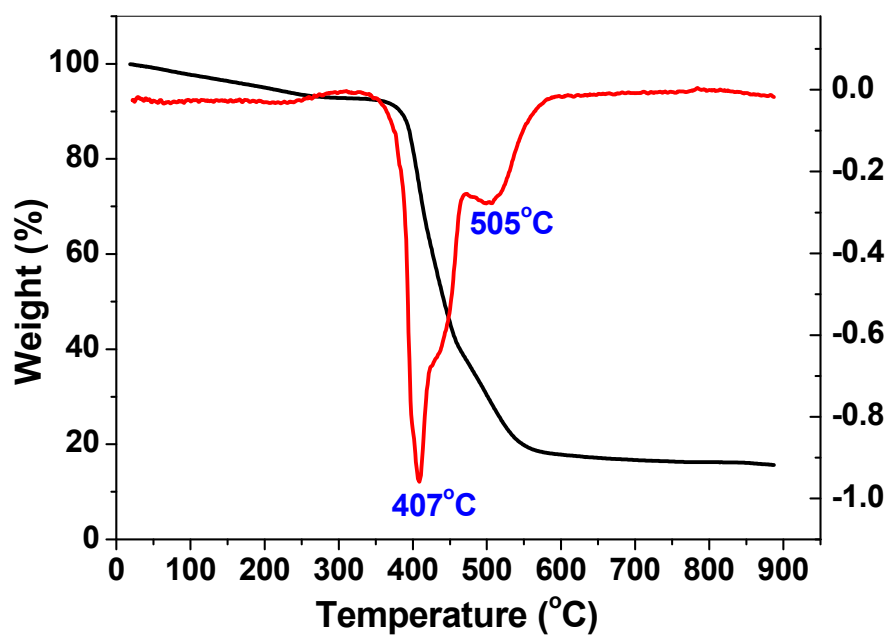

**Fig. S2** Thermogravimetric (TG) analysis curve of **1**.

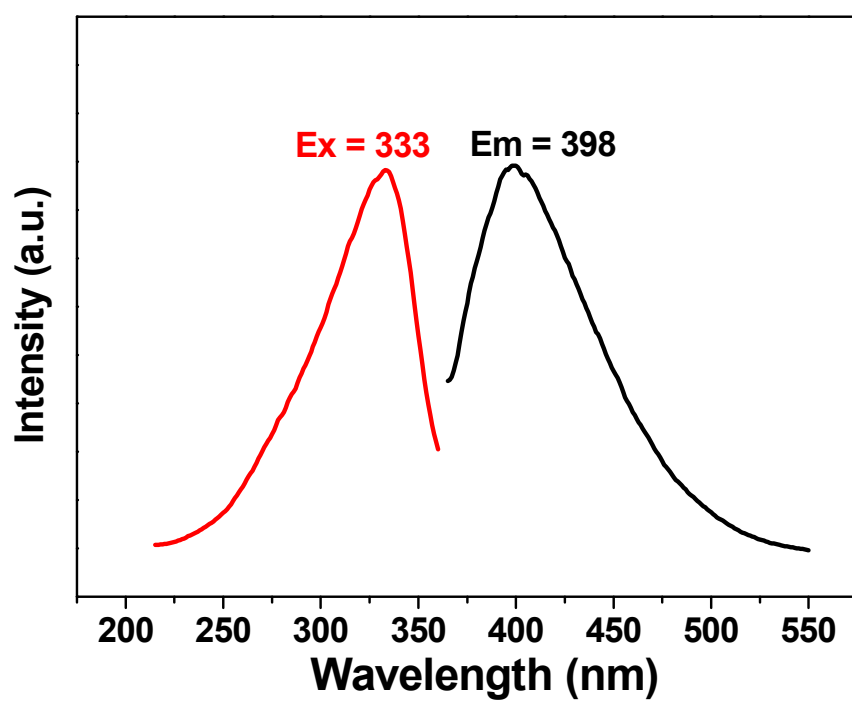

**Fig. S3** Solid state excitation and emission spectra of H<sub>3</sub>L at room temperature.
